# Supplementary material for: β-Integrin de-phosphorylation by the Density-Enhanced Phosphatase DEP-1 attenuates EGFR signaling in C. elegans
Source: PLoS Genet. 2017 Jan 30;13(1):e1006592. doi: 10.1371/journal.pgen.1006592 (PMC5305270; doi:10.1371/journal.pgen.1006592)
Supplement: S3 Table — (XLSX) [file pgen.1006592.s003.xlsx]

## Sheet: curve fitting
t	empty vector	sem	function	chi sq	function low	chi low	function high	chi high	pat-3i	sem	function	chi sq	function low	chi low	function high	chi high	pat-2i	sem	function	chi sq	function low	chi low	function high	chi high	tln-1i	sem	function	chi sq	function low	chi low	function high	chi high
0	0.353111	0.0178596	0.353111	0	0.335251	0	0.370971	0	0.304263	0.0173207	0.304263	0	0.286943	0	0.321584	0	0.367167	0.0114829	0.367167	0	0.355684	0	0.37865	0	0.339722	0.0203662	0.339722	0	0.319356	0	0.360088	0
8	0.385278	0.016868	0.386485	3.77324e-06	0.371119	1.97775e-05	0.402372	1.27056e-07	0.357	0.0159179	0.345294	0.000396868	0.327889	0.000530879	0.362707	0.000287471	0.417722	0.00989283	0.40213	0.000604584	0.39038	0.000779947	0.413959	0.0004505	0.403333	0.0206894	0.394334	0.000205363	0.376063	0.000115146	0.412768	0.000306878
16	0.445278	0.0151029	0.415632	0.00211451	0.401796	0.00200435	0.430257	0.00210912	0.435421	0.0173481	0.381936	0.00748979	0.364385	0.00791028	0.3995	0.00710296	0.486167	0.0152922	0.433758	0.00633232	0.421559	0.00576919	0.446083	0.00687418	0.484333	0.0201637	0.440568	0.00434763	0.423505	0.00390467	0.457851	0.00475239
24	0.482111	0.0149821	0.441087	0.0038155	0.428035	0.00357068	0.455019	0.00389057	0.461842	0.0176462	0.41466	0.00536863	0.396916	0.00563197	0.432419	0.00512364	0.510833	0.0138586	0.462368	0.00508002	0.449576	0.00499728	0.47531	0.00513054	0.508722	0.0171921	0.479708	0.00175487	0.463194	0.00173354	0.496432	0.00175091
32	0.479944	0.0118604	0.463318	0.000596674	0.450476	0.000688255	0.477008	0.000459029	0.476684	0.0194148	0.443884	0.00242374	0.425911	0.00230876	0.461871	0.00253651	0.528722	0.0185733	0.48825	0.00335486	0.474752	0.00263911	0.5019	0.00410592	0.532278	0.0177661	0.512843	0.000736487	0.496397	0.000661045	0.529449	0.000801075
40	0.501278	0.0180359	0.482732	0.000712471	0.46967	0.00039218	0.496534	0.00104505	0.494895	0.0183477	0.469982	0.00132052	0.451756	0.00136045	0.488223	0.00128217	0.546556	0.0180309	0.511662	0.00237957	0.497376	0.00195071	0.526091	0.00281674	0.548889	0.0206989	0.540895	0.000118148	0.524175	3.07546e-05	0.557706	0.000253159
48	0.501889	0.017118	0.499688	9.69542e-06	0.486087	3.56141e-06	0.513874	5.1268e-05	0.505526	0.0212532	0.49329	0.000303533	0.474792	0.000189313	0.5118	0.000438448	0.541389	0.0174253	0.532841	0.000137115	0.517706	7.56381e-05	0.548101	0.000209409	0.585444	0.0200889	0.564643	0.000766353	0.547414	0.000588054	0.581887	0.000960943
56	0.534889	0.0212115	0.514496	0.000808338	0.500128	0.000367097	0.529272	0.00135988	0.521316	0.0196322	0.514105	0.000101148	0.495325	8.16175e-05	0.532894	0.000121726	0.568722	0.0216384	0.552	0.000506584	0.535974	0.000230266	0.568125	0.000870289	0.575611	0.0192378	0.584747	0.000142737	0.566855	0.000193822	0.602581	9.92118e-05
64	0.535889	0.02239	0.527428	0.000135738	0.512137	3.62199e-06	0.542946	0.000433004	0.527789	0.0221562	0.532693	4.51436e-05	0.513627	0.000124414	0.551767	6.01304e-06	0.576944	0.0190634	0.569331	0.000101813	0.552391	5.45674e-05	0.586343	0.000159326	0.594722	0.019461	0.601767	8.24716e-05	0.58312	0.000105907	0.620291	6.01341e-05
72	0.531056	0.0180449	0.538722	0.000109092	0.522408	0.000169056	0.555089	6.45977e-05	0.536158	0.0212091	0.549294	0.000314143	0.52994	0.000424085	0.568653	0.000223999	0.584	0.0201754	0.585009	1.73898e-06	0.567143	1.94109e-05	0.602917	2.62679e-06	0.600333	0.0208082	0.616176	0.00040732	0.596727	0.000495854	0.635447	0.000322031
80	0.537722	0.0186442	0.548585	0.000215105	0.531193	0.000276329	0.565871	0.000159652	0.549895	0.0204429	0.564119	0.000358678	0.54448	0.000414813	0.583761	0.000308673	0.597667	0.0168222	0.599191	3.8765e-06	0.580399	3.42437e-07	0.617996	1.99052e-05	0.607667	0.01916	0.628374	0.000682373	0.60811	0.000631941	0.648417	0.00071888
88	0.548278	0.0175061	0.557199	0.000142844	0.538707	0.000116899	0.575447	0.000162252	0.571316	0.020105	0.577359	6.32547e-05	0.557441	6.96236e-05	0.597278	5.74462e-05	0.595	0.0172651	0.61202	0.000473315	0.592311	0.000358686	0.631715	0.000598858	0.625111	0.0199809	0.6387	0.000289134	0.617633	0.000253104	0.659517	0.000315488
96	0.554833	0.0204547	0.564722	0.000173163	0.545134	0.000212197	0.58395	0.000128472	0.579789	0.0209601	0.589183	0.000149758	0.568993	0.000181531	0.609372	0.000122014	0.599278	0.0210378	0.623625	0.000950572	0.603015	0.00101787	0.644197	0.000885313	0.617667	0.0196961	0.647443	0.00136941	0.6256	0.00122028	0.669016	0.00149759
104	0.557222	0.0212988	0.571292	0.00034652	0.550631	0.00039282	0.5915	0.000284804	0.573263	0.0222655	0.599742	0.00116906	0.579289	0.00138171	0.620193	0.000980855	0.615389	0.0209809	0.634124	0.0005535	0.612634	0.000542211	0.655552	0.000561321	0.629722	0.024311	0.654844	0.000963733	0.632266	0.0011406	0.677145	0.000788829
112	0.560944	0.022794	0.57703	0.00044841	0.555332	0.00053157	0.598205	0.000349872	0.581	0.0211258	0.609172	0.00130286	0.588467	0.00138926	0.629874	0.00122241	0.613778	0.0230295	0.64362	0.0013837	0.621277	0.00150017	0.665884	0.00126966	0.643111	0.0213238	0.661109	0.000489991	0.637842	0.00040409	0.684102	0.000565397
120	0.550056	0.0223849	0.582041	0.00175773	0.559353	0.00179449	0.60416	0.00166532	0.588579	0.0207927	0.617594	0.00136311	0.596647	0.00139606	0.638536	0.00133203	0.631389	0.0210055	0.652211	0.000664764	0.629045	0.000553598	0.675283	0.000775816	0.652944	0.0223328	0.666414	0.000272234	0.642507	0.000220219	0.690056	0.000316493
128	0.572556	0.0237625	0.586417	0.000327666	0.562792	0.000348202	0.609447	0.000282843	0.607632	0.0209631	0.625114	0.000488951	0.603939	0.000493856	0.646286	0.000484255	0.634111	0.022886	0.659982	0.00101416	0.636024	0.00096694	0.683835	0.00105325	0.654556	0.0251326	0.670904	0.000398384	0.646409	0.00044637	0.695151	0.000343937
136	0.568222	0.0234797	0.590239	0.00082128	0.565733	0.000778837	0.614143	0.000819985	0.605263	0.020101	0.631831	0.00111715	0.610438	0.00104656	0.653219	0.00118782	0.645333	0.0238707	0.667012	0.000704607	0.642296	0.000675759	0.691615	0.000726182	0.657444	0.0251188	0.674706	0.000441603	0.649674	0.000463273	0.699511	0.000410608
144	0.566444	0.0228837	0.593577	0.00124025	0.568249	0.00107262	0.618312	0.00135867	0.611	0.0226749	0.637829	0.00112852	0.616231	0.00126368	0.659423	0.00100537	0.648611	0.0260356	0.673372	0.000910475	0.647932	0.000992329	0.698693	0.000827583	0.664167	0.0238029	0.677924	0.000279184	0.652406	0.000222266	0.703243	0.000331698
152	0.590556	0.0226518	0.596492	5.90847e-05	0.570401	1.09323e-05	0.622015	0.000124713	0.615053	0.0172944	0.643186	0.00123056	0.621394	0.000899027	0.664973	0.00160079	0.657611	0.0231645	0.679124	0.000681498	0.652997	0.000526974	0.705133	0.000841361	0.669667	0.0302153	0.680649	0.000177188	0.654691	0.000354735	0.706436	6.08034e-05
160	0.580944	0.0252007	0.599038	0.000546503	0.572241	0.000475617	0.625303	0.000586953	0.638316	0.0183962	0.64797	0.00014383	0.625996	5.89888e-05	0.669939	0.000261167	0.6545	0.0239036	0.684328	0.00130015	0.657548	0.00110468	0.710992	0.00149367	0.679889	0.0272077	0.682955	1.37666e-05	0.656602	2.34189e-05	0.709169	6.05495e-06
168	0.579611	0.0259338	0.601261	0.00077958	0.573815	0.000706745	0.628223	0.000818637	0.648316	0.0205667	0.652242	2.36324e-05	0.630098	8.75981e-06	0.674383	4.48583e-05	0.652944	0.0227311	0.689036	0.00189045	0.661638	0.00149248	0.716322	0.00230642	0.673444	0.0235636	0.684908	0.000191864	0.658202	0.000105193	0.711508	0.000295481
176	0.591667	0.0241808	0.603203	0.000220635	0.575162	0.000102437	0.630816	0.000355168	0.639368	0.0186617	0.656057	0.000424528	0.633755	0.000268643	0.678358	0.000609148	0.672278	0.0260847	0.693294	0.000637088	0.665313	0.000549445	0.721172	0.000721409	0.686611	0.0251453	0.686561	3.66934e-09	0.65954	5.62422e-06	0.713509	4.30512e-06
184	0.584167	0.0266135	0.604899	0.000710566	0.576313	0.000610665	0.633118	0.000788141	0.643737	0.0201623	0.659464	0.000375088	0.637014	0.00028354	0.681915	0.000475951	0.682944	0.0255442	0.697146	0.000289314	0.668615	0.000188103	0.725584	0.00040277	0.668056	0.0236455	0.68796	0.000575909	0.660659	0.000399648	0.715222	0.000773515
192	0.592667	0.026478	0.60638	0.000310117	0.577298	0.000213784	0.635163	0.000403959	0.655421	0.0199497	0.662507	7.57955e-05	0.639919	3.09108e-05	0.685097	0.000138079	0.694722	0.028885	0.700631	4.98325e-05	0.671582	4.91492e-05	0.729598	4.91882e-05	0.685611	0.0242053	0.689145	1.81231e-05	0.661596	5.4419e-08	0.716688	6.58813e-05
200	0.604333	0.0264029	0.607673	1.83555e-05	0.57814	7.61793e-08	0.636978	6.11727e-05	0.657211	0.0197603	0.665225	9.65507e-05	0.642508	3.98172e-05	0.687944	0.000175029	0.694944	0.0265601	0.703783	0.000111008	0.674249	5.1013e-05	0.73325	0.000188139	0.693722	0.0250005	0.690148	1.85091e-05	0.662379	6.07363e-05	0.717942	8.48362e-07
208	0.596	0.0285954	0.608803	0.00026923	0.578861	0.00022673	0.638591	0.000306722	0.676368	0.0230442	0.667652	0.000113807	0.644816	0.000112263	0.690491	0.000115264	0.721167	0.0299157	0.706635	0.000298843	0.676645	0.000315268	0.736572	0.000285833	0.704333	0.0238848	0.690997	0.000257383	0.663034	0.000457371	0.719016	0.000117775
216	0.618667	0.0287837	0.609789	0.000129243	0.579477	0.000186864	0.640023	8.62041e-05	0.672842	0.023028	0.669819	1.36454e-05	0.646873	1.33712e-05	0.692771	1.38677e-05	0.713556	0.0301984	0.709214	2.65725e-05	0.678799	3.06132e-05	0.739595	2.33827e-05	0.701722	0.025678	0.691716	0.000144745	0.663583	0.000234019	0.719935	7.74171e-05
224	0.616944	0.0299635	0.610651	6.48685e-05	0.580004	8.3925e-05	0.641294	4.91452e-05	0.670947	0.0214586	0.671754	9.69464e-07	0.648707	9.42948e-07	0.69481	8.31606e-06	0.709556	0.031095	0.711548	5.57837e-06	0.680734	7.58976e-06	0.742346	3.87038e-06	0.691	0.0279985	0.692325	2.5345e-06	0.664041	1.62841e-06	0.720721	4.11603e-06
232	0.607667	0.0297685	0.611403	2.28334e-05	0.580455	1.12607e-05	0.642423	3.87275e-05	0.681053	0.021829	0.673483	8.50821e-05	0.650341	0.000121323	0.696634	5.6028e-05	0.7155	0.0302469	0.713659	4.75063e-06	0.682472	1.13296e-05	0.744848	1.0857e-06	0.689333	0.0244669	0.69284	1.77466e-05	0.664425	2.93142e-07	0.721394	7.99305e-05
240	0.619444	0.0315953	0.61206	8.90899e-05	0.58084	8.45729e-05	0.643426	9.01011e-05	0.686474	0.0270104	0.675027	0.000194122	0.651798	9.01515e-05	0.698267	0.000331644	0.717833	0.0333005	0.715568	7.17025e-06	0.684035	3.62511e-07	0.747124	2.15199e-05	0.707444	0.0303005	0.693276	0.00028956	0.664746	0.000231223	0.72197	0.0003447
248	0.621944	0.0337503	0.612634	0.000141496	0.58117	8.48934e-05	0.644316	0.000200948	0.670526	0.0225718	0.676405	5.10932e-05	0.653096	4.04787e-05	0.699727	6.2798e-05	0.7385	0.0305424	0.717296	0.00062684	0.685439	0.000739804	0.749195	0.000525782	0.694389	0.030482	0.693645	7.97307e-07	0.665015	1.84561e-06	0.722462	8.02961e-06
256	0.629	0.0317464	0.613135	0.000410504	0.581452	0.000429416	0.645107	0.000379164	0.690316	0.0258689	0.677636	0.000237255	0.654253	0.000158817	0.701034	0.000327449	0.733667	0.0312112	0.718858	0.000305059	0.686701	0.000361462	0.751079	0.000253498	0.707389	0.032279	0.693958	0.00025995	0.665239	0.000146451	0.722884	0.000389686
264	0.636111	0.0340524	0.613573	0.000827897	0.581693	0.000712999	0.645809	0.000918465	0.699263	0.0267587	0.678736	0.000620829	0.655285	0.000452488	0.702203	0.000807956	0.73	0.0347123	0.720272	0.000131398	0.687834	8.07642e-05	0.752794	0.000188701	0.708778	0.0307404	0.694222	0.000305173	0.665427	0.000238961	0.723245	0.000366151
272	0.628667	0.0342278	0.613955	0.00035252	0.5819	0.000270203	0.646432	0.000419229	0.698316	0.0245799	0.679718	0.000508881	0.656204	0.000468377	0.703249	0.000548881	0.738611	0.0332525	0.72155	0.0004034	0.688853	0.000395483	0.754353	0.000406453	0.720333	0.0289526	0.694446	0.000964985	0.665585	0.000999773	0.723554	0.000915126
280	0.643611	0.032797	0.614289	0.00139966	0.582076	0.00141884	0.646986	0.00133799	0.709421	0.0257489	0.680594	0.00122096	0.657024	0.00108081	0.704185	0.00136341	0.748222	0.0344402	0.722707	0.000900823	0.689769	0.000835988	0.755772	0.000956744	0.715778	0.0308792	0.694636	0.000643459	0.665716	0.000552728	0.723818	0.000720642
288	0.645278	0.0287853	0.61458	0.00153329	0.582227	0.0020166	0.647478	0.0010916	0.710211	0.0233662	0.681377	0.00122009	0.657755	0.00128652	0.705022	0.00115652	0.766389	0.0374469	0.723753	0.00251163	0.690591	0.00212972	0.757063	0.00288968	0.711278	0.0319439	0.694797	0.000390944	0.665826	0.000274027	0.724044	0.000507937
296	0.644333	0.0331426	0.614835	0.00141526	0.582356	0.00142771	0.647914	0.00134878	0.712316	0.0256571	0.682077	0.00134061	0.658406	0.00121238	0.705771	0.00146925	0.752278	0.0348566	0.7247	0.00104946	0.691331	0.00098464	0.758238	0.00110126	0.719889	0.0308712	0.694933	0.000896226	0.665918	0.000801263	0.724238	0.000971263
n=	19								18								18								18
		CURVE FITTING I=C+A*(1-e^-kt)
			vector contr	low	high				pat-3i	low	high						pat-2i	low	high						tln-1i	low	high
		A	0.263479	0.247868	0.280406			A	0.383653	0.376804	0.390553					A	0.366509	0.342199	0.391434					A	0.35596	0.347034	0.365298
		k	0.0169299	0.0195385	0.0148458			k	0.0141387	0.0143796	0.0139075					k	0.0125322	0.0133636	0.011817					k	0.0208191	0.0223021	0.0194662
		C	0.353111	0.335251	0.370971			C	0.304263	0.286943	0.321584	0.370971				C	0.367167	0.355684	0.37865					C	0.339722	0.319356	0.360088
		sum(chi^2)	0.0230795	0.0218168	0.0240304			sum(chi^2)	0.0328822	0.0328265	0.0333902					sum(chi^2)	0.0363884	0.0329789	0.0399982					sum(chi^2)	0.0189163	0.0177199	0.0203053
		minimum	0.353111	0.335251	0.370971			minimum	0.304263	0.286943	0.321584					minimum	0.367167	0.355684	0.37865					minimum	0.339722	0.319356	0.360088
		maximum	0.616591	0.583119	0.651376			maximum	0.687917	0.663746	0.712137					maximum	0.733675	0.697883	0.770084					maximum	0.695683	0.66639	0.725387
		difference	0.291222	0.015283	0.261724			difference	0.408053	0.00833645	0.377814					difference	0.385111	0.0233737	0.357533					difference	0.380167	0.010505	0.35521
		30% recovery	0.568741	0.556834	0.580647			30% recovery	0.536175	0.524628	0.547723					30% recovery	0.578111	0.570456	0.585766					30% recovery	0.559815	0.546237	0.573392
		t 1/3	100.763	114.845	92.7792			t 1/3	65.6047	69.2927	62.209					t 1/3	68.3812	73.9208	63.7351					t 1/3	46.2622	47.5588	45.0457		t=ln(1-((I-C)/A)/-k
		50% recovery	0.676556	0.667626	0.685485			50% recovery	0.652132	0.643471	0.660792					50% recovery	0.683583	0.677842	0.689325					50% recovery	0.669861	0.659678	0.680044
		t1/2	#NUM!	#NUM!	#NUM!			t1/2	167.782	203.227	145.892					t1/2	158.804	212.339	133.566					t1/2	126.019	176.914	107.184
		% mobile fr.	0.407302	0.372874	0.445775			% mobile fr.	0.551435	0.528434	0.575684					% mobile fr.	0.579155	0.531104	0.629973					% mobile fr.	0.539107	0.509861	0.570857
			%mobile fraction	sem	95% conf	t1/3	sem	95% conf	TINV (0.05)
		vector contr	0.407302	0.0364504	0.0762916	100.763	11.0329	23.0922	2.09302
		pat-3i	0.551435	0.0236248	0.0496338	65.6047	3.54184	7.44112	2.10092
		pat-2i	0.579155	0.0494346	0.103858	68.3812	5.09286	10.6997	2.10092
		tln-1i	0.539107	0.0304982	0.0640744	46.2622	1.25656	2.63994	2.10092																			t1/3
					N
					=TINV(0.05,N-1)

## Sheet: empty vector
empty vector	average	stdev	sem			1	2	4	5	6	7	8	9	10	11	12	13	14	15	18	19	20	21
-16	1.00422	0.0230997	0.00544464			0.976	0.991	0.982	0.983	1	0.997	1.008	0.995	1.05	1.016	0.988	1.026	0.988	0.989	1.055	1.034	0.999	0.999
-8	0.995722	0.0241169	0.0056844			1.025	1.01	1.018	1.017	1	1.004	0.991	1.006	0.95	0.984	1.013	0.973	1.013	1.012	0.941	0.964	1.001	1.001
0	0.353111	0.075772	0.0178596			0.31	0.33	0.196	0.266	0.306	0.387	0.335	0.464	0.406	0.349	0.328	0.458	0.467	0.41	0.441	0.286	0.315	0.302
8	0.385278	0.0715647	0.016868			0.381	0.369	0.237	0.272	0.298	0.451	0.369	0.479	0.477	0.371	0.415	0.482	0.434	0.438	0.424	0.326	0.367	0.345
16	0.445278	0.0640761	0.0151029			0.472	0.396	0.413	0.354	0.379	0.501	0.353	0.528	0.521	0.353	0.489	0.513	0.439	0.539	0.475	0.4	0.476	0.414
24	0.482111	0.0635637	0.0149821			0.504	0.478	0.394	0.379	0.415	0.544	0.479	0.542	0.609	0.399	0.505	0.476	0.509	0.534	0.459	0.442	0.567	0.443
32	0.479944	0.0503195	0.0118604			0.495	0.456	0.383	0.42	0.435	0.533	0.488	0.51	0.498	0.435	0.524	0.484	0.482	0.568	0.461	0.437	0.573	0.457
40	0.501278	0.0765197	0.0180359			0.546	0.462	0.385	0.454	0.396	0.551	0.481	0.578	0.527	0.397	0.585	0.468	0.494	0.599	0.469	0.53	0.661	0.44
48	0.501889	0.0726255	0.017118			0.566	0.479	0.425	0.46	0.46	0.502	0.454	0.562	0.585	0.379	0.588	0.493	0.478	0.604	0.431	0.482	0.644	0.442
56	0.534889	0.0899927	0.0212115			0.594	0.506	0.453	0.468	0.5	0.578	0.445	0.57	0.571	0.458	0.622	0.525	0.447	0.643	0.429	0.626	0.752	0.441
64	0.535889	0.0949928	0.02239			0.649	0.469	0.391	0.51	0.513	0.583	0.484	0.572	0.56	0.383	0.748	0.537	0.48	0.638	0.473	0.56	0.649	0.447
72	0.531056	0.0765579	0.0180449			0.666	0.451	0.372	0.495	0.533	0.579	0.517	0.536	0.575	0.426	0.6	0.525	0.498	0.659	0.476	0.555	0.605	0.491
80	0.537722	0.0791007	0.0186442			0.639	0.486	0.388	0.508	0.49	0.518	0.483	0.567	0.577	0.501	0.644	0.53	0.511	0.686	0.469	0.523	0.675	0.484
88	0.548278	0.074272	0.0175061			0.674	0.482	0.439	0.535	0.476	0.594	0.502	0.596	0.475	0.481	0.665	0.52	0.518	0.637	0.502	0.587	0.66	0.526
96	0.554833	0.0867818	0.0204547			0.702	0.472	0.488	0.538	0.544	0.626	0.51	0.565	0.54	0.412	0.65	0.517	0.478	0.717	0.483	0.574	0.677	0.494
104	0.557222	0.090363	0.0212988			0.714	0.443	0.435	0.57	0.541	0.612	0.498	0.559	0.5	0.429	0.614	0.5	0.553	0.714	0.502	0.676	0.655	0.515
112	0.560944	0.0967066	0.022794			0.699	0.473	0.454	0.551	0.477	0.615	0.537	0.558	0.53	0.452	0.652	0.527	0.507	0.733	0.445	0.708	0.686	0.493
120	0.550056	0.0949709	0.0223849			0.729	0.485	0.426	0.598	0.492	0.544	0.522	0.571	0.544	0.411	0.624	0.509	0.515	0.723	0.479	0.649	0.645	0.435
128	0.572556	0.100816	0.0237625			0.742	0.459	0.425	0.587	0.521	0.651	0.528	0.558	0.558	0.42	0.678	0.561	0.557	0.777	0.532	0.651	0.63	0.471
136	0.568222	0.0996161	0.0234797			0.742	0.465	0.454	0.625	0.522	0.626	0.518	0.609	0.542	0.435	0.683	0.507	0.513	0.758	0.458	0.649	0.627	0.495
144	0.566444	0.0970871	0.0228837			0.694	0.485	0.42	0.574	0.543	0.6	0.586	0.589	0.49	0.457	0.722	0.533	0.531	0.806	0.508	0.598	0.577	0.483
152	0.590556	0.0961036	0.0226518			0.677	0.466	0.464	0.6	0.541	0.67	0.53	0.599	0.573	0.54	0.632	0.571	0.507	0.785	0.508	0.722	0.744	0.501
160	0.580944	0.106917	0.0252007			0.681	0.477	0.455	0.572	0.54	0.678	0.492	0.598	0.534	0.448	0.786	0.59	0.516	0.77	0.481	0.691	0.658	0.49
168	0.579611	0.110028	0.0259338			0.686	0.482	0.398	0.641	0.521	0.586	0.547	0.597	0.549	0.441	0.774	0.552	0.55	0.81	0.488	0.636	0.685	0.49
176	0.591667	0.102591	0.0241808			0.712	0.495	0.437	0.64	0.56	0.7	0.547	0.56	0.531	0.483	0.717	0.558	0.577	0.765	0.522	0.722	0.678	0.446
184	0.584167	0.112911	0.0266135			0.696	0.489	0.397	0.675	0.575	0.696	0.562	0.602	0.486	0.477	0.737	0.542	0.567	0.79	0.489	0.724	0.571	0.44
192	0.592667	0.112337	0.026478			0.726	0.48	0.411	0.65	0.574	0.769	0.526	0.603	0.49	0.452	0.723	0.548	0.58	0.785	0.505	0.673	0.661	0.512
200	0.604333	0.112018	0.0264029			0.712	0.505	0.476	0.631	0.49	0.754	0.54	0.588	0.533	0.528	0.716	0.549	0.6	0.849	0.458	0.734	0.679	0.536
208	0.596	0.12132	0.0285954			0.724	0.458	0.464	0.637	0.566	0.779	0.531	0.555	0.475	0.503	0.712	0.565	0.552	0.834	0.463	0.772	0.636	0.502
216	0.618667	0.122119	0.0287837			0.754	0.504	0.477	0.678	0.619	0.802	0.498	0.604	0.529	0.505	0.756	0.637	0.595	0.807	0.488	0.821	0.547	0.515
224	0.616944	0.127125	0.0299635			0.786	0.514	0.446	0.647	0.654	0.793	0.548	0.584	0.489	0.433	0.767	0.584	0.571	0.809	0.513	0.817	0.581	0.569
232	0.607667	0.126297	0.0297685			0.751	0.49	0.412	0.669	0.616	0.744	0.547	0.574	0.483	0.454	0.749	0.571	0.6	0.782	0.551	0.852	0.617	0.476
240	0.619444	0.134047	0.0315953			0.772	0.478	0.522	0.705	0.656	0.796	0.526	0.57	0.486	0.449	0.775	0.549	0.626	0.808	0.471	0.854	0.6	0.507
248	0.621944	0.14319	0.0337503			0.75	0.498	0.431	0.669	0.637	0.822	0.499	0.588	0.492	0.459	0.783	0.627	0.547	0.862	0.484	0.869	0.647	0.531
256	0.629	0.134689	0.0317464			0.807	0.522	0.466	0.723	0.679	0.788	0.498	0.637	0.451	0.49	0.73	0.589	0.575	0.818	0.482	0.853	0.68	0.534
264	0.636111	0.144472	0.0340524			0.742	0.533	0.522	0.794	0.552	0.799	0.563	0.614	0.426	0.48	0.782	0.597	0.575	0.847	0.505	0.942	0.608	0.569
272	0.628667	0.145216	0.0342278			0.767	0.528	0.45	0.749	0.65	0.766	0.519	0.604	0.482	0.5	0.757	0.546	0.6	0.841	0.447	0.953	0.565	0.592
280	0.643611	0.139146	0.032797			0.78	0.545	0.462	0.81	0.631	0.809	0.554	0.602	0.494	0.477	0.766	0.629	0.607	0.816	0.513	0.929	0.578	0.583
288	0.645278	0.122126	0.0287853			0.717	0.502	0.502	0.81	0.616	0.813	0.546	0.596	0.504	0.515	0.765	0.599	0.603	0.8	0.537	0.856	0.63	0.704
296	0.644333	0.140612	0.0331426			0.754	0.519	0.523	0.772	0.563	0.794	0.535	0.596	0.496	0.48	0.837	0.643	0.584	0.917	0.531	0.868	0.563	0.623
mobile fr	0.291222	0.108192
n	18

## Sheet: tln-1i
tln-1i	average	stdev	sem		1	3	4	5	6	7	9	13	14	16	17	18	19	20	21	22	23	24
-16	0.997722	0.0273642	0.00644981		0.969	1.019	0.981	1.037	0.968	0.953	0.97	1.034	0.967	1.033	0.989	1.011	1.013	0.984	1.014	1.017	1.024	0.976
-8	1.00272	0.0284104	0.00669641		1.033	0.981	1.019	0.963	1.032	1.051	1.032	0.965	1.035	0.967	1.011	0.988	0.987	1.017	0.985	0.983	0.975	1.025
0	0.339722	0.0864066	0.0203662		0.38	0.372	0.351	0.145	0.537	0.229	0.373	0.362	0.382	0.419	0.351	0.298	0.292	0.328	0.423	0.356	0.24	0.277
8	0.403333	0.0877778	0.0206894		0.472	0.486	0.376	0.22	0.6	0.307	0.444	0.402	0.402	0.493	0.38	0.366	0.284	0.392	0.491	0.407	0.392	0.346
16	0.484333	0.0855474	0.0201637		0.551	0.541	0.432	0.333	0.635	0.418	0.547	0.445	0.487	0.523	0.514	0.454	0.335	0.394	0.631	0.482	0.536	0.46
24	0.508722	0.0729398	0.0171921		0.555	0.576	0.493	0.385	0.622	0.438	0.612	0.508	0.512	0.534	0.527	0.415	0.352	0.487	0.565	0.525	0.547	0.504
32	0.532278	0.075375	0.0177661		0.644	0.575	0.536	0.451	0.635	0.379	0.594	0.542	0.517	0.575	0.515	0.456	0.383	0.511	0.598	0.544	0.578	0.548
40	0.548889	0.0878179	0.0206989		0.684	0.605	0.534	0.433	0.686	0.469	0.578	0.541	0.495	0.571	0.504	0.444	0.349	0.586	0.631	0.574	0.595	0.601
48	0.585444	0.0852299	0.0200889		0.696	0.686	0.532	0.532	0.723	0.471	0.691	0.551	0.545	0.602	0.562	0.492	0.405	0.57	0.617	0.586	0.654	0.623
56	0.575611	0.081619	0.0192378		0.691	0.642	0.546	0.475	0.668	0.484	0.59	0.536	0.544	0.635	0.551	0.513	0.38	0.597	0.662	0.565	0.672	0.61
64	0.594722	0.0825661	0.019461		0.667	0.627	0.554	0.54	0.728	0.513	0.619	0.548	0.554	0.611	0.555	0.485	0.42	0.649	0.728	0.648	0.683	0.576
72	0.600333	0.0882816	0.0208082		0.706	0.586	0.567	0.493	0.737	0.513	0.676	0.586	0.546	0.589	0.501	0.59	0.419	0.655	0.706	0.611	0.727	0.598
80	0.607667	0.0812889	0.01916		0.73	0.611	0.559	0.569	0.703	0.483	0.648	0.562	0.544	0.568	0.566	0.497	0.492	0.689	0.639	0.654	0.73	0.694
88	0.625111	0.0847716	0.0199809		0.717	0.662	0.611	0.623	0.765	0.518	0.65	0.548	0.57	0.608	0.578	0.519	0.446	0.727	0.706	0.655	0.713	0.636
96	0.617667	0.0835633	0.0196961		0.713	0.653	0.627	0.568	0.688	0.485	0.705	0.594	0.61	0.56	0.517	0.609	0.422	0.667	0.744	0.656	0.675	0.625
104	0.629722	0.103143	0.024311		0.834	0.573	0.589	0.624	0.709	0.497	0.741	0.596	0.601	0.595	0.515	0.557	0.405	0.684	0.717	0.714	0.706	0.678
112	0.643111	0.0904693	0.0213238		0.838	0.673	0.625	0.705	0.694	0.541	0.719	0.603	0.648	0.564	0.48	0.58	0.482	0.689	0.713	0.674	0.713	0.635
120	0.652944	0.0947501	0.0223328		0.843	0.693	0.639	0.649	0.688	0.592	0.693	0.548	0.62	0.62	0.5	0.577	0.476	0.707	0.791	0.733	0.731	0.653
128	0.654556	0.106629	0.0251326		0.909	0.657	0.614	0.592	0.745	0.484	0.759	0.524	0.669	0.664	0.581	0.594	0.477	0.744	0.716	0.711	0.697	0.645
136	0.657444	0.10657	0.0251188		0.923	0.679	0.628	0.59	0.7	0.51	0.737	0.566	0.68	0.546	0.592	0.605	0.5	0.776	0.748	0.705	0.74	0.609
144	0.664167	0.100987	0.0238029		0.835	0.64	0.641	0.632	0.788	0.52	0.773	0.597	0.669	0.606	0.576	0.617	0.49	0.75	0.859	0.648	0.665	0.649
152	0.669667	0.128193	0.0302153		0.93	0.651	0.564	0.655	0.823	0.492	0.806	0.593	0.698	0.61	0.553	0.599	0.45	0.837	0.807	0.683	0.678	0.625
160	0.679889	0.115433	0.0272077		0.903	0.658	0.591	0.618	0.802	0.53	0.776	0.642	0.716	0.593	0.543	0.622	0.481	0.836	0.813	0.737	0.704	0.673
168	0.673444	0.0999719	0.0235636		0.853	0.655	0.657	0.572	0.778	0.553	0.792	0.57	0.68	0.606	0.586	0.582	0.527	0.802	0.786	0.717	0.732	0.674
176	0.686611	0.106683	0.0251453		0.915	0.701	0.627	0.601	0.821	0.514	0.681	0.631	0.694	0.641	0.585	0.673	0.541	0.819	0.847	0.725	0.682	0.661
184	0.668056	0.100319	0.0236455		0.853	0.677	0.636	0.559	0.709	0.512	0.7	0.574	0.626	0.679	0.603	0.573	0.542	0.848	0.785	0.765	0.705	0.679
192	0.685611	0.102694	0.0242053		0.873	0.661	0.662	0.529	0.806	0.534	0.73	0.611	0.713	0.645	0.62	0.647	0.524	0.83	0.788	0.722	0.766	0.68
200	0.693722	0.106068	0.0250005		0.874	0.702	0.602	0.587	0.787	0.585	0.773	0.643	0.674	0.618	0.589	0.661	0.513	0.893	0.816	0.741	0.736	0.693
208	0.704333	0.101335	0.0238848		0.904	0.741	0.652	0.588	0.737	0.591	0.791	0.674	0.697	0.645	0.608	0.667	0.513	0.87	0.805	0.763	0.752	0.68
216	0.701722	0.108942	0.025678		0.866	0.734	0.626	0.575	0.854	0.624	0.799	0.609	0.668	0.604	0.611	0.707	0.491	0.842	0.827	0.735	0.77	0.689
224	0.691	0.118788	0.0279985		0.919	0.726	0.623	0.528	0.83	0.567	0.762	0.586	0.647	0.659	0.569	0.65	0.512	0.858	0.772	0.772	0.797	0.661
232	0.689333	0.103804	0.0244669		0.853	0.721	0.668	0.55	0.816	0.531	0.766	0.554	0.685	0.635	0.59	0.646	0.585	0.873	0.771	0.732	0.738	0.694
240	0.707444	0.128554	0.0303005		0.905	0.729	0.621	0.496	0.878	0.595	0.762	0.622	0.686	0.661	0.617	0.703	0.469	0.915	0.849	0.742	0.78	0.704
248	0.694389	0.129324	0.030482		0.892	0.71	0.634	0.486	0.812	0.563	0.757	0.582	0.735	0.522	0.6	0.705	0.493	0.878	0.822	0.81	0.745	0.753
256	0.707389	0.136948	0.032279		0.865	0.765	0.598	0.457	0.838	0.62	0.726	0.611	0.673	0.663	0.594	0.648	0.498	0.966	0.878	0.814	0.707	0.812
264	0.708778	0.13042	0.0307404		0.845	0.723	0.622	0.464	0.855	0.533	0.804	0.601	0.759	0.675	0.673	0.637	0.492	0.872	0.893	0.745	0.774	0.791
272	0.720333	0.122836	0.0289526		0.873	0.745	0.632	0.442	0.868	0.609	0.81	0.625	0.722	0.694	0.626	0.71	0.531	0.869	0.832	0.797	0.799	0.782
280	0.715778	0.131009	0.0308792		0.873	0.757	0.635	0.45	0.883	0.569	0.818	0.589	0.691	0.631	0.642	0.715	0.558	0.819	0.943	0.772	0.807	0.732
288	0.711278	0.135526	0.0319439		0.83	0.766	0.634	0.371	0.902	0.613	0.799	0.633	0.719	0.647	0.609	0.762	0.504	0.833	0.883	0.767	0.771	0.76
296	0.719889	0.130975	0.0308712		0.856	0.755	0.633	0.409	0.887	0.619	0.78	0.639	0.705	0.648	0.669	0.754	0.519	0.918	0.848	0.807	0.801	0.711
mobile fr	0.380167	0.108691
n	18

## Sheet: pat-3i
pat-3i	average	stdev	sem				2	3	4	5	6	7	8	9	10	13	1	2	3	5	6	7	8	9	10
-16	1.01121	0.0205874	0.00472308				0.992	0.988	0.993	1.003	1.038	1.006	1.009	1.021	1.007	1.008	1.014	0.982	1.004	1.034	1.045	0.99	1.037	1.049	0.993
-8	0.988632	0.0208252	0.00477763				1.008	1.012	1.007	0.997	0.962	0.994	0.991	0.979	0.992	0.992	0.986	1.018	0.996	0.964	0.954	1.011	0.962	0.952	1.007
0	0.304263	0.075499	0.0173207				0.296	0.17	0.255	0.284	0.252	0.286	0.357	0.344	0.243	0.222	0.367	0.401	0.414	0.33	0.23	0.295	0.228	0.346	0.461
8	0.357	0.0693846	0.0159179				0.32	0.277	0.317	0.332	0.301	0.317	0.355	0.376	0.332	0.328	0.382	0.468	0.505	0.37	0.285	0.322	0.282	0.418	0.496
16	0.435421	0.0756184	0.0173481				0.387	0.39	0.364	0.453	0.359	0.362	0.468	0.516	0.391	0.469	0.412	0.524	0.575	0.415	0.327	0.448	0.338	0.519	0.556
24	0.461842	0.0769179	0.0176462				0.43	0.376	0.459	0.433	0.426	0.369	0.458	0.489	0.392	0.53	0.423	0.539	0.61	0.403	0.412	0.48	0.398	0.496	0.652
32	0.476684	0.0846273	0.0194148				0.424	0.399	0.465	0.413	0.412	0.415	0.49	0.524	0.353	0.592	0.432	0.539	0.64	0.457	0.424	0.519	0.414	0.48	0.665
40	0.494895	0.0799756	0.0183477				0.49	0.427	0.526	0.482	0.397	0.396	0.477	0.465	0.397	0.548	0.441	0.599	0.681	0.487	0.435	0.525	0.455	0.539	0.636
48	0.505526	0.0926405	0.0212532				0.514	0.422	0.54	0.5	0.395	0.393	0.47	0.562	0.433	0.593	0.434	0.616	0.685	0.499	0.377	0.487	0.472	0.517	0.696
56	0.521316	0.0855746	0.0196322				0.494	0.462	0.52	0.537	0.439	0.434	0.435	0.55	0.448	0.624	0.439	0.674	0.668	0.506	0.414	0.519	0.49	0.591	0.661
64	0.527789	0.0965767	0.0221562				0.49	0.488	0.55	0.554	0.374	0.418	0.499	0.588	0.434	0.627	0.426	0.676	0.682	0.522	0.391	0.598	0.465	0.584	0.662
72	0.536158	0.0924483	0.0212091				0.521	0.465	0.572	0.495	0.433	0.447	0.493	0.605	0.455	0.63	0.499	0.708	0.739	0.508	0.444	0.552	0.431	0.543	0.647
80	0.549895	0.0891085	0.0204429				0.47	0.47	0.559	0.58	0.464	0.492	0.535	0.632	0.46	0.57	0.453	0.746	0.676	0.509	0.46	0.558	0.488	0.661	0.665
88	0.571316	0.0876356	0.020105				0.558	0.491	0.573	0.52	0.453	0.503	0.486	0.629	0.533	0.675	0.508	0.695	0.769	0.567	0.473	0.622	0.508	0.617	0.675
96	0.579789	0.0913629	0.0209601				0.57	0.518	0.635	0.638	0.438	0.501	0.516	0.671	0.481	0.684	0.501	0.686	0.711	0.501	0.435	0.668	0.558	0.649	0.655
104	0.573263	0.0970532	0.0222655				0.533	0.538	0.618	0.568	0.457	0.524	0.534	0.657	0.465	0.643	0.45	0.736	0.758	0.487	0.462	0.689	0.519	0.573	0.681
112	0.581	0.0920851	0.0211258				0.598	0.55	0.581	0.626	0.484	0.584	0.478	0.695	0.449	0.718	0.477	0.695	0.729	0.492	0.482	0.554	0.527	0.643	0.677
120	0.588579	0.0906332	0.0207927				0.564	0.561	0.652	0.609	0.466	0.566	0.552	0.739	0.481	0.735	0.475	0.713	0.664	0.547	0.434	0.635	0.526	0.63	0.634
128	0.607632	0.091376	0.0209631				0.591	0.625	0.692	0.596	0.481	0.598	0.561	0.75	0.466	0.681	0.481	0.731	0.695	0.559	0.476	0.672	0.561	0.605	0.724
136	0.605263	0.0876184	0.020101				0.604	0.548	0.71	0.621	0.498	0.563	0.601	0.697	0.483	0.676	0.438	0.758	0.699	0.583	0.494	0.646	0.565	0.648	0.668
144	0.611	0.0988377	0.0226749				0.669	0.551	0.759	0.622	0.517	0.59	0.533	0.694	0.477	0.718	0.45	0.677	0.766	0.592	0.476	0.707	0.519	0.613	0.679
152	0.615053	0.0753846	0.0172944				0.628	0.581	0.673	0.611	0.509	0.619	0.54	0.741	0.524	0.709	0.522	0.642	0.688	0.612	0.505	0.619	0.567	0.649	0.747
160	0.638316	0.0801873	0.0183962				0.72	0.621	0.729	0.645	0.553	0.626	0.568	0.764	0.536	0.752	0.515	0.703	0.704	0.595	0.509	0.641	0.589	0.658	0.7
168	0.648316	0.0896481	0.0205667				0.672	0.628	0.74	0.678	0.528	0.71	0.62	0.744	0.531	0.78	0.52	0.683	0.708	0.585	0.478	0.634	0.616	0.678	0.785
176	0.639368	0.0813444	0.0186617				0.698	0.623	0.684	0.667	0.566	0.704	0.618	0.733	0.582	0.766	0.479	0.682	0.67	0.576	0.455	0.625	0.63	0.667	0.723
184	0.643737	0.0878856	0.0201623				0.671	0.672	0.724	0.641	0.491	0.725	0.585	0.671	0.554	0.786	0.469	0.687	0.689	0.581	0.523	0.654	0.648	0.712	0.748
192	0.655421	0.0869587	0.0199497				0.694	0.706	0.691	0.735	0.535	0.731	0.579	0.681	0.603	0.863	0.489	0.669	0.656	0.615	0.533	0.643	0.639	0.652	0.739
200	0.657211	0.0861333	0.0197603				0.682	0.717	0.747	0.772	0.525	0.707	0.667	0.682	0.552	0.797	0.484	0.654	0.653	0.616	0.517	0.645	0.664	0.68	0.726
208	0.676368	0.100447	0.0230442				0.766	0.784	0.741	0.806	0.544	0.786	0.595	0.667	0.526	0.817	0.496	0.721	0.673	0.639	0.524	0.656	0.719	0.684	0.707
216	0.672842	0.100377	0.023028				0.734	0.8	0.71	0.822	0.518	0.746	0.577	0.707	0.524	0.846	0.515	0.699	0.689	0.643	0.566	0.622	0.713	0.634	0.719
224	0.670947	0.0935358	0.0214586				0.738	0.732	0.748	0.868	0.542	0.743	0.664	0.658	0.549	0.787	0.514	0.737	0.659	0.612	0.566	0.584	0.686	0.645	0.716
232	0.681053	0.0951505	0.021829				0.697	0.793	0.743	0.889	0.54	0.769	0.634	0.67	0.573	0.829	0.551	0.734	0.678	0.621	0.578	0.634	0.668	0.631	0.708
240	0.686474	0.117736	0.0270104				0.726	0.774	0.81	0.931	0.55	0.774	0.648	0.742	0.546	0.854	0.465	0.718	0.631	0.613	0.532	0.628	0.703	0.689	0.709
248	0.670526	0.0983883	0.0225718				0.717	0.757	0.758	0.885	0.581	0.778	0.625	0.701	0.596	0.784	0.489	0.705	0.647	0.518	0.574	0.636	0.654	0.643	0.692
256	0.690316	0.11276	0.0258689				0.686	0.787	0.75	0.958	0.581	0.753	0.615	0.718	0.567	0.843	0.498	0.605	0.669	0.587	0.579	0.679	0.686	0.765	0.79
264	0.699263	0.116638	0.0267587				0.791	0.813	0.771	0.941	0.474	0.83	0.644	0.68	0.655	0.841	0.582	0.683	0.617	0.564	0.538	0.697	0.719	0.719	0.727
272	0.698316	0.107141	0.0245799				0.772	0.783	0.712	0.95	0.528	0.823	0.603	0.733	0.617	0.851	0.597	0.695	0.643	0.576	0.592	0.687	0.669	0.672	0.765
280	0.709421	0.112237	0.0257489				0.695	0.832	0.746	0.985	0.547	0.8	0.621	0.743	0.667	0.876	0.574	0.715	0.632	0.611	0.579	0.748	0.675	0.656	0.777
288	0.710211	0.101851	0.0233662				0.775	0.795	0.74	0.947	0.581	0.807	0.64	0.801	0.616	0.82	0.598	0.685	0.629	0.659	0.568	0.756	0.638	0.656	0.783
296	0.712316	0.111837	0.0256571				0.799	0.803	0.732	0.947	0.519	0.79	0.66	0.765	0.615	0.902	0.572	0.738	0.66	0.608	0.576	0.737	0.644	0.713	0.754
mobile fr	0.408053	0.0936678
n	19

## Sheet: pat-2i
pat-2i	average	stdev	sem			1	2	3	4	5	6	7	8	9	11	15	16	17	18	19	20	21	22
-16	0.9975	0.0294743	0.00694716			0.938	0.985	0.992	0.993	0.992	1.043	0.975	0.97	1.01	1.028	1.006	1.017	1.015	0.96	1.007	0.976	1.059	0.989
-8	1.00278	0.0303868	0.00716224			1.064	1.015	1.008	1.007	1.008	0.956	1.026	1.031	0.99	0.972	0.994	0.983	0.985	1.042	0.993	1.026	0.939	1.011
0	0.367167	0.048718	0.0114829			0.331	0.342	0.343	0.274	0.34	0.424	0.44	0.343	0.41	0.343	0.403	0.458	0.427	0.367	0.315	0.354	0.341	0.354
8	0.417722	0.0419717	0.00989283			0.372	0.412	0.426	0.338	0.417	0.417	0.44	0.389	0.477	0.398	0.416	0.507	0.425	0.45	0.365	0.391	0.476	0.403
16	0.486167	0.0648793	0.0152922			0.392	0.428	0.49	0.398	0.484	0.428	0.472	0.564	0.543	0.457	0.524	0.616	0.501	0.511	0.395	0.507	0.582	0.459
24	0.510833	0.058797	0.0138586			0.46	0.493	0.54	0.442	0.465	0.447	0.49	0.568	0.499	0.492	0.538	0.652	0.509	0.545	0.418	0.538	0.603	0.496
32	0.528722	0.0787997	0.0185733			0.476	0.489	0.5	0.46	0.457	0.414	0.504	0.724	0.54	0.539	0.544	0.627	0.497	0.601	0.474	0.583	0.633	0.455
40	0.546556	0.0764985	0.0180309			0.478	0.519	0.56	0.446	0.459	0.456	0.476	0.703	0.575	0.514	0.583	0.666	0.558	0.597	0.51	0.566	0.668	0.504
48	0.541389	0.0739293	0.0174253			0.521	0.553	0.593	0.473	0.455	0.408	0.49	0.695	0.523	0.531	0.559	0.688	0.514	0.571	0.515	0.58	0.599	0.477
56	0.568722	0.091804	0.0216384			0.545	0.525	0.599	0.506	0.46	0.445	0.513	0.783	0.497	0.567	0.583	0.716	0.582	0.621	0.519	0.604	0.699	0.473
64	0.576944	0.0808793	0.0190634			0.586	0.523	0.572	0.517	0.473	0.471	0.538	0.713	0.556	0.548	0.538	0.724	0.571	0.617	0.523	0.64	0.743	0.532
72	0.584	0.0855969	0.0201754			0.586	0.549	0.638	0.524	0.542	0.426	0.494	0.744	0.574	0.542	0.544	0.75	0.567	0.593	0.55	0.612	0.731	0.546
80	0.597667	0.0713706	0.0168222			0.619	0.503	0.616	0.552	0.533	0.492	0.551	0.733	0.548	0.519	0.587	0.71	0.648	0.69	0.592	0.62	0.671	0.574
88	0.595	0.0732498	0.0172651			0.648	0.549	0.645	0.597	0.495	0.502	0.491	0.706	0.498	0.582	0.587	0.698	0.602	0.678	0.585	0.598	0.705	0.544
96	0.599278	0.0892556	0.0210378			0.671	0.49	0.711	0.544	0.502	0.482	0.516	0.687	0.564	0.588	0.573	0.761	0.638	0.612	0.565	0.599	0.765	0.519
104	0.615389	0.0890143	0.0209809			0.725	0.516	0.673	0.583	0.522	0.465	0.538	0.767	0.599	0.609	0.556	0.728	0.635	0.726	0.545	0.569	0.723	0.598
112	0.613778	0.0977058	0.0230295			0.703	0.513	0.696	0.557	0.513	0.486	0.553	0.757	0.62	0.565	0.556	0.741	0.593	0.727	0.581	0.597	0.795	0.495
120	0.631389	0.0891187	0.0210055			0.705	0.561	0.71	0.595	0.525	0.527	0.54	0.751	0.571	0.647	0.583	0.786	0.646	0.675	0.607	0.634	0.79	0.512
128	0.634111	0.0970972	0.022886			0.679	0.511	0.68	0.559	0.461	0.5	0.543	0.782	0.644	0.58	0.607	0.815	0.679	0.719	0.642	0.64	0.741	0.632
136	0.645333	0.101275	0.0238707			0.699	0.519	0.701	0.548	0.505	0.456	0.571	0.779	0.68	0.585	0.63	0.798	0.697	0.75	0.658	0.64	0.789	0.611
144	0.648611	0.11046	0.0260356			0.747	0.551	0.774	0.579	0.507	0.482	0.505	0.806	0.602	0.617	0.611	0.798	0.712	0.732	0.61	0.655	0.818	0.569
152	0.657611	0.0982788	0.0231645			0.726	0.543	0.682	0.64	0.548	0.516	0.545	0.857	0.577	0.643	0.606	0.8	0.732	0.724	0.685	0.663	0.775	0.575
160	0.6545	0.101414	0.0239036			0.738	0.632	0.766	0.514	0.505	0.515	0.526	0.798	0.609	0.636	0.622	0.793	0.64	0.749	0.741	0.659	0.76	0.578
168	0.652944	0.0964398	0.0227311			0.756	0.568	0.732	0.553	0.486	0.52	0.55	0.743	0.634	0.621	0.599	0.804	0.666	0.747	0.703	0.659	0.794	0.618
176	0.672278	0.110668	0.0260847			0.77	0.551	0.779	0.547	0.492	0.531	0.577	0.817	0.686	0.631	0.631	0.771	0.72	0.686	0.711	0.716	0.893	0.592
184	0.682944	0.108375	0.0255442			0.825	0.591	0.809	0.596	0.536	0.542	0.544	0.821	0.642	0.621	0.633	0.786	0.773	0.763	0.696	0.727	0.821	0.567
192	0.694722	0.122549	0.028885			0.85	0.612	0.847	0.598	0.52	0.539	0.546	0.886	0.606	0.673	0.669	0.833	0.708	0.781	0.692	0.689	0.87	0.586
200	0.694944	0.112685	0.0265601			0.822	0.635	0.824	0.606	0.534	0.598	0.553	0.829	0.716	0.69	0.601	0.774	0.665	0.797	0.709	0.699	0.914	0.543
208	0.721167	0.126922	0.0299157			0.885	0.614	0.845	0.604	0.574	0.606	0.539	0.821	0.729	0.7	0.619	0.828	0.761	0.82	0.709	0.719	1.005	0.603
216	0.713556	0.128121	0.0301984			0.888	0.646	0.882	0.574	0.533	0.631	0.553	0.84	0.638	0.657	0.639	0.839	0.708	0.761	0.717	0.717	0.989	0.632
224	0.709556	0.131925	0.031095			0.878	0.671	0.918	0.554	0.544	0.544	0.507	0.8	0.653	0.69	0.627	0.897	0.716	0.815	0.718	0.694	0.894	0.652
232	0.7155	0.128327	0.0302469			0.917	0.68	0.86	0.594	0.543	0.549	0.551	0.871	0.641	0.765	0.645	0.871	0.667	0.771	0.742	0.712	0.905	0.595
240	0.717833	0.141282	0.0333005			0.897	0.619	0.969	0.633	0.489	0.555	0.56	0.854	0.607	0.685	0.629	0.918	0.8	0.76	0.736	0.695	0.882	0.633
248	0.7385	0.12958	0.0305424			0.936	0.727	0.892	0.573	0.544	0.567	0.617	0.85	0.718	0.752	0.615	0.915	0.729	0.836	0.751	0.716	0.92	0.635
256	0.733667	0.132418	0.0312112			0.91	0.691	0.923	0.554	0.51	0.574	0.576	0.831	0.756	0.8	0.661	0.903	0.791	0.732	0.743	0.722	0.911	0.618
264	0.73	0.147272	0.0347123			0.938	0.687	0.896	0.528	0.54	0.566	0.542	0.806	0.72	0.768	0.657	0.955	0.752	0.808	0.796	0.706	0.94	0.535
272	0.738611	0.141078	0.0332525			0.92	0.654	0.941	0.594	0.582	0.531	0.547	0.86	0.68	0.783	0.662	0.948	0.781	0.816	0.79	0.716	0.905	0.585
280	0.748222	0.146117	0.0344402			0.987	0.676	0.977	0.558	0.563	0.607	0.565	0.816	0.766	0.733	0.651	0.953	0.712	0.823	0.759	0.737	0.961	0.624
288	0.766389	0.158874	0.0374469			0.941	0.669	0.955	0.617	0.59	0.638	0.591	0.778	0.755	0.733	0.653	0.957	0.765	0.821	0.847	0.756	1.159	0.57
296	0.752278	0.147884	0.0348566			0.944	0.661	0.954	0.559	0.529	0.64	0.588	0.81	0.659	0.744	0.658	0.954	0.795	0.856	0.803	0.754	1.009	0.624
mobile fr	0.385111	0.0983011
n	18
